# Supplementary material
Source: publisher figshare collection journal article supplement (https://karger.figshare.com/ndownloader/files/30806755)
Supplement: Supplementary file 1 [file 30806755]

**Supplementary Table 1. Differences in participants characteristics between PIM users and non-PIM users**

| Participants characteristics | PIM users  (N=313) | non-PIM users  (N=1069) | Overall  (N=1382) | P-value |
| --- | --- | --- | --- | --- |
|  |  |  |  |  |
| Age [years] | median 69  IQR 67-71 | median 69  IQR 67-71 | median 69  IQR 67-71 | n. s. |
|  | (N=313) | (N=1069) | (N=1382) |  |
| Women | 57.8%  (N=313) | 49.4%  (N=1069) | 51.3%  (N=1382) | 0.009* |
| Number of regular medications | median 4  IQR 2-6  (N=313) | median 2  IQR 0-4  (N=1069) | median 2  IQR 1-4  (N=1382) | <0.001* |
| Morbidity index | median 1  IQR 0-2  (N=295) | median 1  IQR 0-2  (N=963) | median 1  IQR 0-2  (N=1258) | <0.001* |
| BMI [kg/m²] | mean 27.5 ± 4.5  (N=306) | mean 26.5 ± 4.0  (N=1050) | mean 26.8 ± 4.1  (N=1356) | n. s. |
| Current smoking | 7.4%  (N=312) | 9.2%  (N=1069) | 8.8%  (N=1373) | n. s. |
| Alcohol consumption | 89.1%  (N=313) | 89.7%  (N=1066) | 89.6%  (N=1379) | n. s. |
| Years of education | median 13  IQR 11.5 – 16  (N=229) | median 14  IQR 11.5 – 18  (N=818) | median 13.5  IQR 11.5 – 18  (N=1047) | 0.037* |
| Living alone | 38.9%  (N=270) | 39.2%  (N=988) | 39.1%  (N=1258) | n. s. |
|  |  |  |  |  |

Notes and abbreviations; Differences in participants characteristics between PIM users and non-PIM users. The proportion of women, the number of regular medications and the morbidity index was significantly higher among PIM users [1].

In non-PIM users time of education was significantly longer (Mann-Whitney U test, p = 0.037). PIM, potentially inappropriate medication; BMI, body mass index; IQR, interquartile range; n. s., not significant

**References**

1. Toepfer S, Bolbrinker J, Konig M, Steinhagen-Thiessen E, Kreutz R, Demuth I. Potentially inappropriate medication in older participants of the Berlin Aging Study II (BASE-II) - Sex differences and associations with morbidity and medication use. PLoS One. 2019;14(12):e0226511. Epub 2019/12/31. doi: 10.1371/journal.pone.0226511. PubMed PMID: 31887163.
